# Supplementary material for: DNA assembly of silicon quantum dots/gold nanoparticle nanocomposites
Source: Royal Society of Chemistry journal article supplement (doi:10.1039/c6ra13565j), 2016-01-01
Supplement: c6ra13565j1.pdf [file c6ra13565j1.pdf]

## Supporting Information

### DNA Assembly of Silicon Quantum Dots / Gold Nanoparticle Nanocomposites

Asuka Inoue<sup>a</sup>, Hiroshi Sugimoto<sup>a</sup>, Hidenobu Yaku<sup>b</sup> and Minoru Fujii<sup>a,†</sup>

<sup>a</sup>. Department of Electrical and Electronic Engineering, Graduate School of Engineering, Kobe University, Rokkodai, Nada, Kobe 657-8501, Japan.

<sup>b</sup>. Advanced Research Division, Panasonic Corporation 3-4, Hikaridai, Seika-cho, Souraku-gun, Kyoto, 619-0237, Japan

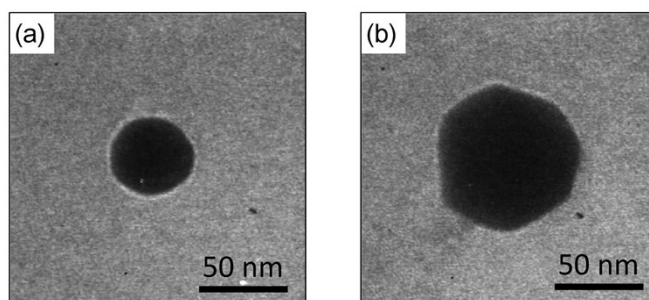

**Figure S1.** TEM image of (a) citrate coated and (b) ssDNA modified Au-NPs.

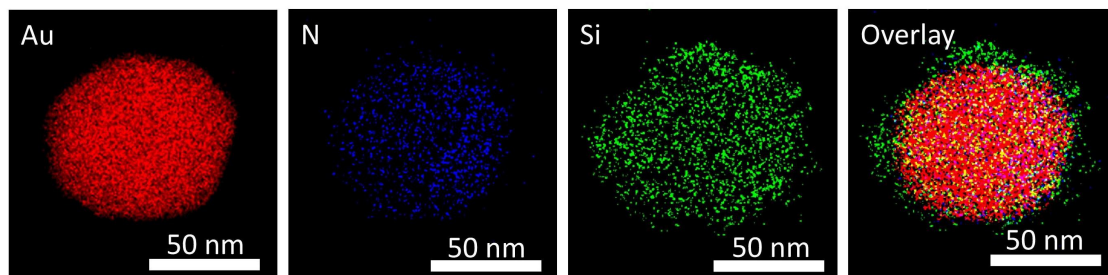

**Figure S2.** STEM-EDS element mapping of a Si-QDs / Au-NP nanocomposite formed by DNA hybridization
